# Supplementary material for: A Candidate Approach Implicates the Secreted Salmonella Effector Protein SpvB in P-Body Disassembly
Source: PubMed Central journal article supplement (PMC3046968; doi:10.1371/journal.pone.0017296), 2011-03-01
Supplement: pone.0017296.s005.pdf [file pone.0017296.s005.pdf]

**Table S1.** List of the primers used to construct and verify the *Salmonella* mutant strains.

| mutant strain | Strain reference | GFP-tagged strain reference | Oligos for mutant strains                                                                                                                             | Oligos for verification                                              |
|---------------|------------------|-----------------------------|-------------------------------------------------------------------------------------------------------------------------------------------------------|----------------------------------------------------------------------|
| <i>ΔsopD</i>  | JVS-2890         | JVS-8706                    | JVO-2463- TATCGTCACCACAAAGGATTACCAACCATAAATGTGCTGTGTAGGCTGGAGCTGCTTC<br>JVO-2464- TCCGGCAGGCAGCCGGATTTTAAATTGGTTATATTACTGAGGTCCATATGAATATCCTCCTTAG    | JVO-1919- CCAGTAACCCACAGCC<br>JVO-1920- TGCATGAAGGGTAATTGTC          |
| <i>ΔpipB</i>  | JVS-3453         | JVS-8693                    | JVO-3048- ATGTGACTTGACTCACACCTATAAGGAGTCGGCTCACTTCGTGTAGGCTGGAGCTGCTTC<br>JVO-3049- GTAACGCTATGATTACAGACAAAGCCAACAAGTAATACGCTGGTCCATATGAATATCCTCCTTAG | JVO-3100- TGTCAGATGCCAGACACC<br>JVO-3101- ATCTGTAGGTGACCGGAAG        |
| <i>ΔgogB</i>  | JVS-3455         | JVS-8689                    | JVO-3050- ACGATCGGTATTAGGCTAGGTTCTAAATCTTGCTGAATGGTGTAGGCTGGAGCTGCTTC<br>JVO-3051- ACTCCAATAGGCTGCTCTATATATAAATATATTAATTGCGGTCCATATGAATATCCTCCTTAG    | JVO-3096- CAGTCAGTCTGACTAAACAGC<br>JVO-3097- CCTTGCCAAACAGATATGTAG   |
| <i>ΔpipB2</i> | JVS-3469         | JVS-8694                    | JVO-3046- ATGGAGCGTTCCTACTCGATAGTCTGGCTGGTATGGCTAAGTGTAGGCTGGAGCTGCTTC<br>JVO-3047- CTCTCAGCTACTATTACAGTACGAGATTGTTATTCTTACATGGTCCATATGAATATCCTCCTTAG | JVO-3098- AGCAACGCGTGTGATAC<br>JVO-3099- ACAGGCACCTTATACATCCAGG      |
| <i>ΔsifA</i>  | JVS-3471         | JVS-8690                    | JVO-3136- TCCTTACCAACTCCCAAGGAATACGAAAGAAGCATGGTGGTGTAGGCTGGAGCTGCTTC<br>JVO-3137- TCCGATCCGGTCCATATGCGGCATTATTGTGCCTGGCAAGGGTCCATATGAATATCCTCCTTAG   | JVO-3138- ACGCTATCACAGACAGTAATGC<br>JVO-3139- AGCCAGGAAGAAGCAAGC     |
| <i>ΔslrP</i>  | JVS-3473         | JVS-8695                    | JVO-3054- ATCCTTATCTGTTACTTTAGGTTACGTTACAGATCAGGTAGGTGTAGGCTGGAGCTGCTTC<br>JVO-3055- AGTAGTACGCTCTGCGTCAGAGTCGCTGCTATTCTTAGGTCCATATGAATATCCTCCTTAG    | JVO-3104- AGCGTGTGATGGCAACAG<br>JVO-3105- TCATGAGCGAGCTCACCTC        |
| <i>ΔsifB</i>  | JVS-3582         | JVS-8696                    | JVO-3170- AATCACTTGTGGTCTACATTATGCCAATTACTATCGGGAGGTGTAGGCTGGAGCTGCTTC<br>JVO-3171- TCCATACTATTTATGGTGTGATCAACTCTGGTGTAGGCTGGTCCATATGAATATCCTCCTTAG   | JVO-3172- ATGTTGACGGTTCAGGAC<br>JVO-3173- AACGAGCCAATTCGTTTC         |
| <i>ΔspvB</i>  | JVS-3621         | JVS-8707                    | JVO-3187- TCGTCAGACGGCCAGTTTCAGGAGATAGTGTATGTTGATACGTGTAGGCTGGAGCTGCTTC<br>JVO-3188- AGCTGGCTTGCAAAGTCTTGGGATCCACAATTTACAATGCGGTCCATATGAATATCCTCCTTAG | JVO-3189- TAGAGCAGACGCTGTAAGC<br>JVO-3190- TGTGTCAGCAGTTGCATC        |
| <i>ΔspvC</i>  | JVS-3622         | JVS-8708                    | JVO-3191- AAACATCCCTCCTTTGAATATTGTAGCTGCTTATGATGGGGTGTAGGCTGGAGCTGCTTC<br>JVO-3192- TTAGTGTCCGGTGTCTCCCAAACCCATACTACTCTGTGCGGTCCATATGAATATCCTCCTTAG   | JVO-3193- ATCCATATCGCAAAGGAG<br>JVO-3194- ATGAGCGTTATTCTTTACG        |
| <i>ΔsseF</i>  | JVS-3623         | JVS-8699                    | JVO-3195- AGTCGATGGTAATAGTCTCTTCCGATATACAAGCGAAGGTGTAGGCTGGAGCTGCTTC<br>JVO-3196- AGGCAATAATCCAGTACCGCACCTATCGCCGTGAGGCTAACGGTCCATATGAATATCCTCCTTAG   | JVO-3197- TCATGGAGTGAGATTGCGC<br>JVO-3198- ATCGGCATGAAGTTTCATC       |
| <i>ΔsseG</i>  | JVS-3624         | JVS-8700                    | JVO-3199- ATTGCCACATCCGGAAACCAATATGGAGAGTGGTAGAATAGTGTAGGCTGGAGCTGCTTC<br>JVO-3200- ATTGCCACATCCGGAAACCAATATGGAGAGTGGTAGAATAGTGTAGGCTGGAGCTGCTTC      | JVO-3201- TGGACAGTTCTGATCATAATC<br>JVO-3202- TGTCTGCGGTTACCTGAG      |
| <i>Δssel</i>  | JVS-3626         | JVS-8701                    | JVO-3203- TATGCCCTTTTCATATTGGAAGCGGATGTCTTCCCGCCATCGTGTAGGCTGGAGCTGCTTC<br>JVO-3204- ATCGCCGATTGACAGGGTCTGACAGACGTCCTCCACGGGTCCATATGAATATCCTCCTTAG    | JVO-3205- AGGAAGAGATGATGTCTGTGCG<br>JVO-3206- TCTGTCATCTGTGATAGTGTCC |
| <i>ΔsseK1</i> | JVS-3627         | JVS-8703                    | JVO-3178- TTATGATCCCACCATTAAATAGATATGTTCCCGCGCTTTCGTGTAGGCTGGAGCTGCTTC<br>JVO-3179- TTCAATAGCATGATTATTGCCATTTCCGCTACTGCACATGGGTCCATATGAATATCCTCCTTAG  | JVO-3180- TAGCTGACAGCGATTGCAAC<br>JVO-3181- TGCCGTATATCTCCGTTCTG     |

|                             |          |          |                                                                                                                                                         |                                                                                    |
|-----------------------------|----------|----------|---------------------------------------------------------------------------------------------------------------------------------------------------------|------------------------------------------------------------------------------------|
| <i>ΔsseL</i>                | JVS-3628 | JVS-8705 | JVO-3211- ACAGCTTATATACAGAAGAGGTGAGCGATGAGGCGCTTACGTGTAGGCTGGAGCTGCTTC<br>JVO-3212- ACCACAGCCGTTGGGTACATTGTTCTGTAAATTCATTCGGTCCATATGAATATCCTCCTTAG      | JVO-3213- TTCGCTACTTTCCTTACCAG<br>JVO-3214- AGTGTGGTAGCAGGATCG                     |
| <i>ΔsteC</i>                | JVS-3630 | JVS-8711 | JVO-3227- AGTTGCCAGATATCAGAAAGGTATTTAAGAGATATCATCGGTGTAGGCTGGAGCTGCTTC<br>JVO-3228- TTCATCCTTTAATACCTTAGCCACAAGAGTCCCTTCCCGGTCCATATGAATATCCTCCTTAG      | JVO-3229- TCAGAGGATGAGACATATGC<br>JVO-3230- ATCTGTAGCGAATGTGCC                     |
| <i>ΔsteA</i>                | JVS-3632 | JVS-8709 | JVO-3219- AGGATATGCCATATACATCAGTTTCTACCTATGCCAGAGCGGTGTAGGCTGGAGCTGCTTC<br>JVO-3220- TGAGGTAAGGCATTATATGCTGCCATTCGCTCTCTGACGGGGTCCATATGAATATCCTCCTTAG   | JVO-3221- TCGTCATAATGAGAGAGGAGTAG<br>JVO-3222- AGAATCTCTTTGCGACACG                 |
| <i>ΔspiC</i>                | JVS-3634 | JVS-8691 | JVO-3174- ATAGAACTCCATTTATGCTGTGAGGAGGATTCATGCGTGTAGGCTGGAGCTGCTTC<br>JVO-3175- TACTTGTGGTATAATAACCGTTTAACCATCCCCATCCGCGGTCCATATGAATATCCTCCTTAG         | JVO-3176- AGGTATATGTAGACAGCATCC<br>JVO-3177- AATAGCAATAAGCTCAGAGC                  |
| <i>ΔsseK2</i>               | JVS-3637 | JVS-8704 | JVO-3182- TCCCGGATTAGAGGTTTGATTTTCATGTCAAAGTAATACTCGTGTAGGCTGGAGCTGCTTC<br>JVO-3183- AATGCTGGATGCTCGCTGCGGTTAACAGCAATAATCCGGTCCATATGAATATCCTCCTTAG      | JVO-3184- TTAGCATTGTGACGTTAACG<br>JVO-3185- AACCTTTACTGAGCCAGTC                    |
| <i>ΔsspH2</i>               | JVS-3639 | JVS-8692 | JVO-3215- TCAGTAATCGCCGATTTATCGTATTGCCTGGTCTGATACGTGTAGGCTGGAGCTGCTTC<br>JVO-3216- TATCTTTGTGCGACCCGACCTCATTCACTGGTGCATCAGGGTCCATATGAATATCCTCCTTAG      | JVO-3217- ATGCCCTTTCATATTGGAAG<br>JVO-3218- ACCTGTACATCATCCGCTACTG                 |
| <i>ΔsteB</i>                | JVS-3641 | JVS-8710 | JVO-3223- TCAGGTAATAATCCATGCCTATTTTCGATTTGTAACATGGGTGTAGGCTGGAGCTGCTTC<br>JVO-3224 - AGTGACAGGTTAGCAGATGTTTCAGGCCAAACCAAGTTGGGTCCATATGAATATCCTCCTTAG    | JVO-3225- TTCCAGGCTTAGTCAATGTG<br>JVO-3226- AAGGACATGGCATGACAC                     |
| <i>ΔsseJ</i>                | JVS-3642 | JVS-8702 | JVO-3207- AGCAGTCAGATAATATGTACCAGGCATTAACCTCACGTTGGTGTAGGCTGGAGCTGCTTC<br>JVO-3208- ATGGACTTCTGGGTTGGATGGACAAGGTGCGTTGAAGACGGTCCATATGAATATCCTCCTTAG     | JVO-3209- AGCTCATACTCACGCCAG<br>JVO-3210- ATCGGCAGCAAGATAGC                        |
| <i>ΔsspH1</i>               | JVS-3667 | JVS-8698 | JVO-3245- TCTGTAAGTATGCAGGCTATTGCTGGTGCAGCGGCACCAGGTGTAGGCTGGAGCTGCTTC<br>JVO-3246- AAGCGTTCCGGCACTTTGCGTTCCAGCACGCTGTGTAACGGGTCCATATGAATATCCTCCTTAG    | JVO-3247- ATGTTTAAATATCCGCAATACAC<br>JVO-3248- TCAGCACTTCGTACATACAG                |
| <i>ΔsopD2</i>               | JVS-4373 | JVS-8697 | JVO-4032- ATGTGTCCAAAGAACGTTATGCGCTGTCCAGCGCCTGGCGGTGTAGGCTGGAGCTGCTTC<br>JVO-4033- GAACAGCAGCAGGACGTTATTACTCGTACCTTCACGCAGACCATATGAATATCCTCCTTAG       | JVO-3572-<br>GTTTTTTGACGTCCATAGCGCCCTGGTTTTACT<br>JVO-3037- GTTTTAACTCCCCTGACGAAAG |
| <i>ΔssaM</i>                |          | JVS-8712 | JVO-5227- AATATTCAGCTTTTTATTCAATTAGCAGGATTAGCTGAACGGTGTAGGCTGGAGCTGCTTC<br>JVO-5228- GAGCTCGGCGGAGCTGGAAAGAGGTGGAGAACGGTCCATATGAATATCCTCCTTAG           | JVO-5229- GATTGGGATCTCATTACTGAAC<br>JVO-5230- GCGACTCCAGAAATTTTATTG                |
| <i>ΔssaL</i>                |          | JVS-8713 | JVO-5231- GTTATTTGCGCTTCAATGTTAGCTCTCCAGGAGTTACGTGTAGGCTGGAGCTGCTTC<br>JVO-5232- TCAGAATAAAACCTGATTTATCTTTACTTCCAGAAAGCGTTTCGAGGGTCCATATGAATATCCTCCTTAG | JVO-5233- GCCAGGTTATAGAGGAACAAG<br>JVO-5234- GAGCCAGAAAGCCAATTTA                   |
| $\Delta$ SPI-2              | JVS-1103 | JVS-5294 | The SPI-2 knockout strain was kindly provided by Karsten Tedin                                                                                          |                                                                                    |
| <i>ΔspiC</i> +pLuc          |          | JVS-8714 | JVS-8691 was transformed with the plasmid pXG0-amp                                                                                                      |                                                                                    |
| <i>ΔspiC</i> +p <i>spiC</i> |          | JVS-8715 | JVS-8691 was transformed with the plasmid pXG0-amp-SpiC                                                                                                 |                                                                                    |

|                              |  |          |                                                             |  |
|------------------------------|--|----------|-------------------------------------------------------------|--|
| $\Delta spvB$ +pLuc          |  | JVS-8716 | JVS-8707 was transformed with the plasmid pXG0-amp          |  |
| $\Delta spvB$ +pspvB         |  | JVS-8717 | JVS-8691 was transformed with the plasmid pXG0-amp-SpvB     |  |
| $\Delta spvB$ +<br>pspvB_mut |  | JVS-8718 | JVS-8691 was transformed with the plasmid pXG0-amp-SpvB_mut |  |
