# Supplementary material for: A Candidate Approach Implicates the Secreted Salmonella Effector Protein SpvB in P-Body Disassembly
Source: PubMed Central journal article supplement (PMC3046968; doi:10.1371/journal.pone.0017296), 2011-03-01
Supplement: pone.0017296.s006.pdf [file pone.0017296.s006.pdf]

**Table S2.** List of the primers used for cloning in pXG0-amp.

| construct         | Oligos                                                                                                   |
|-------------------|----------------------------------------------------------------------------------------------------------|
| pXG0-amp-SpiC     | JVO-5225- GTTTTTCTCGAGCAAATTGTAAGTTTTTATGTCAATGCTG<br>JVO-5226- GTTTTTCTAGATTATACCCACCCGAATAAAGTTTATG    |
| pXG0-amp-SpvB     | JVO-5848- GTTTTTCTCGAGGCCAGCCGGCTGTCACC<br>JVO-5849- GTTTTTCTAGACAGCTACAATATTCAAAGGAGGGATG               |
| pXG0-amp-SpvB_mut | JVO-5832- GTTGACATTTTAAAGGAGACGCAGACATGCTTTTCCCTCC<br>JVO-5833- GGAGGGAAAAGCATGTCTGCGTCTCCTTTAAATGTGCAAC |
